# Supplementary material
Source: publisher figshare collection journal article supplement (https://acs.figshare.com/ndownloader/files/3946570)
Supplement: Supplementary file 1 [file 3946570]

data_General
_audit_creation_date                    2013-09-03
_audit_creation_method                 'by CrystalStructure 4.0'
_audit_update_record                    ?

#==============================================================================
# PROCESSING SUMMARY (IUCr Office Use Only)

_journal_date_recd_electronic           ?
_journal_date_from_coeditor             ?
_journal_date_accepted                  ?
_journal_coeditor_code                  ?

#==============================================================================
# SUBMISSION DETAILS

_publ_contact_author_name              'ENTER NAME'
_publ_contact_author_email             'ENTER EMAIL ADDRESS'
_publ_contact_author_fax               'ENTER FAX NUMBER'
_publ_contact_author_phone             'ENTER PHONE NUMBER'
_publ_contact_letter
;
    ENTER TEXT OF LETTER
;
_publ_requested_journal                'ENTER JOURNAL NAME HERE'
_publ_requested_category               'CHOOSE FI FM FO CI CM CO or AD'
_publ_requested_coeditor_name           ?

#==============================================================================
# TITLE AND AUTHOR LIST

_publ_section_title
;
    ENTER SECTION TITLE
;
_publ_section_title_footnote
;
    ENTER FOOTNOTE TO TITLE OF PAPER
;
loop_
_publ_author_name
_publ_author_footnote
_publ_author_address
' FIRST AUTHORS NAME '
;
  FIRST AUTHORS FOOTNOTES
;
;
  FIRST AUTHORS ADDRESS
;
_publ_section_synopsis
;
    ENTER SYNOPSIS
;

#==============================================================================
# TEXT

_publ_section_abstract
;
    ENTER ABSTRACT
;
_publ_section_comment
;
    ENTER TEXT
;
_publ_section_references
;
    ENTER OTHER REFERENCES

    Rigaku (2010). CrystalStructure. Version 4.0. 
    Rigaku Corporation, Tokyo, Japan.

    Altomare, A., Cascarano, G., Giacovazzo, C., Guagliardi, A., 
    Burla, M., Polidori, G., and Camalli, M. (1994) J. Appl. Cryst., 27, 435. 
    SIR92

    Sheldrick, G.M. (2008), Acta Cryst. A64, 112-122.

    Rigaku (1999). NUMABS. 
    Rigaku Corporation, Tokyo, Japan.

;
_publ_section_figure_captions
;
    ENTER FIGURE CAPTIONS
;
_publ_section_exptl_prep
;
    ENTER COMPOUND PREPARATION DETAILS
;
_publ_section_exptl_refinement
;
    ENTER SPECIAL DETAILS OF THE REFINEMENT
;

#==============================================================================
data_Si-T2-20130717

#==============================================================================
# CHEMICAL DATA

_chemical_formula_sum                  'C26 H58 S2 Si8'
_chemical_formula_moiety               'C26 H58 S2 Si8'
_chemical_formula_weight                659.55
_chemical_melting_point                 ?

#==============================================================================
# CRYSTAL DATA
_symmetry_cell_setting                  triclinic
_symmetry_space_group_name_H-M         'P -1'
_symmetry_space_group_name_Hall        '-P 1'
_symmetry_Int_Tables_number             2
loop_
_symmetry_equiv_pos_site_id
_symmetry_equiv_pos_as_xyz
1   '+X,+Y,+Z'
2   '-X,-Y,-Z'
#------------------------------------------------------------------------------
_cell_length_a                          8.7738(18)
_cell_length_b                          9.091(2)
_cell_length_c                          14.938(4)
_cell_angle_alpha                       86.627(11)
_cell_angle_beta                        76.940(9)
_cell_angle_gamma                       61.217(7)
_cell_volume                            1015.5(5)
_cell_formula_units_Z                   1
_cell_measurement_reflns_used           3085
_cell_measurement_theta_min             3.54
_cell_measurement_theta_max             27.48
_cell_measurement_temperature           133
#------------------------------------------------------------------------------
_exptl_crystal_description              block
_exptl_crystal_colour                   colorless
_exptl_crystal_size_max                 0.450
_exptl_crystal_size_mid                 0.350
_exptl_crystal_size_min                 0.050
_exptl_crystal_density_diffrn           1.078
_exptl_crystal_density_meas             ?
_exptl_crystal_density_method          'not measured'
_exptl_crystal_F_000                    358.00
_exptl_absorpt_coefficient_mu           0.382
_exptl_absorpt_correction_type          numerical
_exptl_absorpt_process_details         'NUMABS (Rigaku, 1999)'
_exptl_absorpt_correction_T_min         0.914
_exptl_absorpt_correction_T_max         0.981

#==============================================================================
# EXPERIMENTAL DATA

_diffrn_ambient_temperature             133
_diffrn_radiation_type                 'Mo K\a'
_diffrn_radiation_wavelength            0.71070
_diffrn_measurement_device_type        'Rigaku Saturn724'
_diffrn_measurement_method              \w
_diffrn_detector_area_resol_mean        7.111
_diffrn_reflns_number                   7856
_diffrn_reflns_av_R_equivalents         0.0169
_diffrn_reflns_theta_max                27.48
_diffrn_reflns_theta_full               27.48
_diffrn_measured_fraction_theta_max     0.942
_diffrn_measured_fraction_theta_full    0.942
_diffrn_reflns_limit_h_min             -11
_diffrn_reflns_limit_h_max              8
_diffrn_reflns_limit_k_min             -11
_diffrn_reflns_limit_k_max              10
_diffrn_reflns_limit_l_min             -19
_diffrn_reflns_limit_l_max              19
_diffrn_standards_number                0
_diffrn_standards_interval_count        .
_diffrn_standards_decay_%               ?

#==============================================================================
# REFINEMENT DATA

_refine_special_details
;
    Refinement was performed using all reflections. The weighted 
    R-factor (wR) and goodness of fit (S) are based on F^2^.
    R-factor (gt) are based on F. The threshold expression of
    F^2^ > 2.0 sigma(F^2^) is used only for calculating R-factor (gt).
;
_reflns_number_total                    4387
_reflns_number_gt                       3726
_reflns_threshold_expression            F^2^>2.0\s(F^2^)
_refine_ls_structure_factor_coef        Fsqd
_refine_ls_R_factor_gt                  0.0325
_refine_ls_wR_factor_ref                0.0832
_refine_ls_number_restraints            0
_refine_ls_hydrogen_treatment           constr
_refine_ls_number_reflns                4387
_refine_ls_number_parameters            163
_refine_ls_goodness_of_fit_ref          1.080
_refine_ls_weighting_scheme             calc
_refine_ls_weighting_details
           'w = 1/[\s^2^(Fo^2^)+(0.0435P)^2^+0.1576P] where P=(Fo^2^+2Fc^2^)/3'
_atom_sites_solution_hydrogens          geom
_atom_sites_solution_primary            direct
_atom_sites_solution_secondary          difmap
_refine_ls_shift/su_max                 0.000
_refine_diff_density_max                0.340
_refine_diff_density_min               -0.240
_refine_ls_extinction_method            none
_refine_ls_extinction_coef              ?

loop_
_atom_type_symbol
_atom_type_description
_atom_type_scat_dispersion_real
_atom_type_scat_dispersion_imag
_atom_type_scat_source
  'C' 'C'  0.0033 0.0016 
;
International Tables for Crystallography
(1992, Vol. C, Tables 4.2.6.8 and 6.1.1.4)
;
  'H' 'H'  0.0000 0.0000 
;
International Tables for Crystallography
(1992, Vol. C, Table 6.1.1.4)
;
  'S' 'S'  0.1246 0.1234 
;
International Tables for Crystallography
(1992, Vol. C, Tables 4.2.6.8 and 6.1.1.4)
;
  'Si' 'Si'  0.0817 0.0704 
;
International Tables for Crystallography
(1992, Vol. C, Tables 4.2.6.8 and 6.1.1.4)
;

#==============================================================================
# ATOMIC COORDINATES AND THERMAL PARAMETERS

loop_
_atom_site_label
_atom_site_type_symbol
_atom_site_fract_x
_atom_site_fract_y
_atom_site_fract_z
_atom_site_U_iso_or_equiv
_atom_site_adp_type
_atom_site_occupancy
_atom_site_symmetry_multiplicity
_atom_site_calc_flag
_atom_site_refinement_flags
_atom_site_disorder_assembly
_atom_site_disorder_group
 S1 S 0.59386(5) 0.33609(4) 0.11109(2) 0.02507(10) Uani 1.0 2 d . . .
 Si1 Si 0.85652(5) 0.24537(5) 0.24350(3) 0.02109(10) Uani 1.0 2 d . . .
 Si2 Si 0.93795(6) 0.41111(5) 0.31498(3) 0.02722(11) Uani 1.0 2 d . . .
 Si3 Si 1.10360(6) -0.00764(5) 0.17307(3) 0.02993(12) Uani 1.0 2 d . . .
 Si4 Si 0.63984(6) 0.20286(5) 0.34970(3) 0.03005(12) Uani 1.0 2 d . . .
 C1 C 0.74762(18) 0.36974(17) 0.14882(9) 0.0220(3) Uani 1.0 2 d . . .
 C2 C 0.56126(18) 0.48446(16) 0.02935(9) 0.0214(3) Uani 1.0 2 d . . .
 C3 C 0.7686(2) 0.49289(19) 0.09878(11) 0.0303(4) Uani 1.0 2 d . . .
 C4 C 0.6648(2) 0.55713(18) 0.03163(10) 0.0289(4) Uani 1.0 2 d . . .
 C5 C 1.0225(3) 0.3062(3) 0.41860(12) 0.0409(4) Uani 1.0 2 d . . .
 C6 C 1.1170(3) 0.4414(3) 0.23511(13) 0.0440(5) Uani 1.0 2 d . . .
 C7 C 0.7408(3) 0.6236(2) 0.35139(14) 0.0456(5) Uani 1.0 2 d . . .
 C8 C 0.4396(3) 0.4133(3) 0.38920(12) 0.0410(4) Uani 1.0 2 d . . .
 C9 C 0.5668(3) 0.0721(2) 0.29670(13) 0.0422(5) Uani 1.0 2 d . . .
 C10 C 1.2564(3) 0.0427(3) 0.08351(14) 0.0484(5) Uani 1.0 2 d . . .
 C11 C 0.7277(3) 0.0935(3) 0.45164(14) 0.0576(6) Uani 1.0 2 d . . .
 C12 C 1.0204(3) -0.1244(3) 0.11677(13) 0.0429(5) Uani 1.0 2 d . . .
 C13 C 1.2312(3) -0.1428(3) 0.25825(15) 0.0559(6) Uani 1.0 2 d . . .
 H3 H 0.8467 0.5321 0.1084 0.0363 Uiso 1.0 2 calc R . .
 H4 H 0.6672 0.6422 -0.0078 0.0347 Uiso 1.0 2 calc R . .
 H5A H 0.9269 0.2970 0.4630 0.0491 Uiso 1.0 2 calc R . .
 H5B H 1.0612 0.3731 0.4471 0.0491 Uiso 1.0 2 calc R . .
 H5C H 1.1237 0.1936 0.3998 0.0491 Uiso 1.0 2 calc R . .
 H6A H 1.0748 0.4949 0.1803 0.0528 Uiso 1.0 2 calc R . .
 H6B H 1.2237 0.3320 0.2168 0.0528 Uiso 1.0 2 calc R . .
 H6C H 1.1462 0.5132 0.2664 0.0528 Uiso 1.0 2 calc R . .
 H7A H 0.6945 0.6772 0.2975 0.0547 Uiso 1.0 2 calc R . .
 H7B H 0.7771 0.6932 0.3793 0.0547 Uiso 1.0 2 calc R . .
 H7C H 0.6476 0.6117 0.3964 0.0547 Uiso 1.0 2 calc R . .
 H8A H 0.4033 0.4766 0.3355 0.0492 Uiso 1.0 2 calc R . .
 H8B H 0.4696 0.4757 0.4270 0.0492 Uiso 1.0 2 calc R . .
 H8C H 0.3413 0.3973 0.4257 0.0492 Uiso 1.0 2 calc R . .
 H9A H 0.4831 0.0507 0.3438 0.0506 Uiso 1.0 2 calc R . .
 H9B H 0.6712 -0.0351 0.2712 0.0506 Uiso 1.0 2 calc R . .
 H9C H 0.5079 0.1324 0.2474 0.0506 Uiso 1.0 2 calc R . .
 H10A H 1.1874 0.1258 0.0437 0.0581 Uiso 1.0 2 calc R . .
 H10B H 1.3477 -0.0599 0.0464 0.0581 Uiso 1.0 2 calc R . .
 H10C H 1.3140 0.0887 0.1136 0.0581 Uiso 1.0 2 calc R . .
 H11A H 0.8331 -0.0158 0.4310 0.0691 Uiso 1.0 2 calc R . .
 H11B H 0.6354 0.0769 0.4945 0.0691 Uiso 1.0 2 calc R . .
 H11C H 0.7606 0.1624 0.4828 0.0691 Uiso 1.0 2 calc R . .
 H12A H 0.9543 -0.1648 0.1641 0.0515 Uiso 1.0 2 calc R . .
 H12B H 1.1219 -0.2205 0.0786 0.0515 Uiso 1.0 2 calc R . .
 H12C H 0.9414 -0.0493 0.0780 0.0515 Uiso 1.0 2 calc R . .
 H13A H 1.3366 -0.2433 0.2258 0.0671 Uiso 1.0 2 calc R . .
 H13B H 1.1547 -0.1765 0.3030 0.0671 Uiso 1.0 2 calc R . .
 H13C H 1.2688 -0.0794 0.2904 0.0671 Uiso 1.0 2 calc R . .


loop_
_atom_site_aniso_label
_atom_site_aniso_U_11
_atom_site_aniso_U_22
_atom_site_aniso_U_33
_atom_site_aniso_U_12
_atom_site_aniso_U_13
_atom_site_aniso_U_23
 S1 0.0279(2) 0.02846(19) 0.02258(18) -0.01437(16) -0.01320(15) 0.01151(14)
 Si1 0.0229(2) 0.02004(19) 0.01938(19) -0.00792(16) -0.00979(16) 0.00529(14)
 Si2 0.0338(3) 0.0252(2) 0.0262(3) -0.01449(18) -0.01381(18) 0.00548(16)
 Si3 0.0286(3) 0.0224(2) 0.0316(3) -0.00539(17) -0.00964(19) 0.00071(17)
 Si4 0.0309(3) 0.0360(3) 0.0261(3) -0.01740(19) -0.01168(18) 0.01391(18)
 C1 0.0213(7) 0.0222(7) 0.0196(7) -0.0071(6) -0.0081(6) 0.0034(6)
 C2 0.0213(7) 0.0200(7) 0.0161(7) -0.0045(6) -0.0053(6) 0.0038(5)
 C3 0.0354(9) 0.0337(8) 0.0307(8) -0.0203(7) -0.0179(7) 0.0121(7)
 C4 0.0366(9) 0.0293(8) 0.0257(8) -0.0172(7) -0.0158(7) 0.0132(6)
 C5 0.0537(11) 0.0437(10) 0.0351(9) -0.0251(9) -0.0259(9) 0.0102(8)
 C6 0.0481(11) 0.0549(11) 0.0468(11) -0.0352(10) -0.0217(9) 0.0147(9)
 C7 0.0574(12) 0.0274(9) 0.0494(11) -0.0168(8) -0.0152(10) 0.0001(8)
 C8 0.0343(10) 0.0523(11) 0.0348(9) -0.0208(9) -0.0036(8) -0.0034(8)
 C9 0.0440(11) 0.0356(9) 0.0525(11) -0.0241(8) -0.0126(9) 0.0138(8)
 C10 0.0396(11) 0.0468(11) 0.0497(12) -0.0181(9) 0.0039(9) -0.0120(9)
 C11 0.0558(13) 0.0825(15) 0.0438(11) -0.0387(12) -0.0250(10) 0.0406(11)
 C12 0.0461(11) 0.0335(9) 0.0445(11) -0.0164(8) -0.0057(9) -0.0085(8)
 C13 0.0541(13) 0.0367(10) 0.0599(13) -0.0020(9) -0.0295(11) 0.0075(9)

#==============================================================================
_computing_data_collection             'CrystalClear (Rigaku/MSC Inc., 2006)'
_computing_cell_refinement              CrystalClear
_computing_data_reduction               CrystalClear
_computing_structure_solution          'SIR92 (Altomare, et al., 1994)'
_computing_structure_refinement        'SHELXL97 (Sheldrick, 2008)'
_computing_publication_material        'CrystalStructure 4.0 (Rigaku, 2010)'
_computing_molecular_graphics          'CrystalStructure 4.0'

#==============================================================================
# MOLECULAR GEOMETRY

_geom_special_details
;
    ENTER SPECIAL DETAILS OF THE MOLECULAR GEOMETRY
;

loop_
_geom_bond_atom_site_label_1
_geom_bond_atom_site_label_2
_geom_bond_distance
_geom_bond_publ_flag
_geom_bond_site_symmetry_1
_geom_bond_site_symmetry_2
S1 C1 1.730(2) yes . .
S1 C2 1.7276(15) yes . .
Si1 Si2 2.3434(9) yes . .
Si1 Si3 2.3556(7) yes . .
Si1 Si4 2.3564(8) yes . .
Si1 C1 1.8905(15) yes . .
Si2 C5 1.876(2) yes . .
Si2 C6 1.870(3) yes . .
Si2 C7 1.8709(16) yes . .
Si3 C10 1.872(3) yes . .
Si3 C12 1.870(3) yes . .
Si3 C13 1.875(3) yes . .
Si4 C8 1.8767(16) yes . .
Si4 C9 1.877(3) yes . .
Si4 C11 1.875(3) yes . .
C1 C3 1.373(3) yes . .
C2 C2 1.452(3) yes . 2_665
C2 C4 1.363(3) yes . .
C3 C4 1.417(3) yes . .
C3 H3 0.950 no . .
C4 H4 0.950 no . .
C5 H5A 0.980 no . .
C5 H5B 0.980 no . .
C5 H5C 0.980 no . .
C6 H6A 0.980 no . .
C6 H6B 0.980 no . .
C6 H6C 0.980 no . .
C7 H7A 0.980 no . .
C7 H7B 0.980 no . .
C7 H7C 0.980 no . .
C8 H8A 0.980 no . .
C8 H8B 0.980 no . .
C8 H8C 0.980 no . .
C9 H9A 0.980 no . .
C9 H9B 0.980 no . .
C9 H9C 0.980 no . .
C10 H10A 0.980 no . .
C10 H10B 0.980 no . .
C10 H10C 0.980 no . .
C11 H11A 0.980 no . .
C11 H11B 0.980 no . .
C11 H11C 0.980 no . .
C12 H12A 0.980 no . .
C12 H12B 0.980 no . .
C12 H12C 0.980 no . .
C13 H13A 0.980 no . .
C13 H13B 0.980 no . .
C13 H13C 0.980 no . .

loop_
_geom_angle_atom_site_label_1
_geom_angle_atom_site_label_2
_geom_angle_atom_site_label_3
_geom_angle
_geom_angle_publ_flag
_geom_angle_site_symmetry_1
_geom_angle_site_symmetry_2
_geom_angle_site_symmetry_3
C1 S1 C2 94.09(9) yes . . .
Si2 Si1 Si3 112.85(3) yes . . .
Si2 Si1 Si4 109.52(3) yes . . .
Si2 Si1 C1 107.16(7) yes . . .
Si3 Si1 Si4 112.91(3) yes . . .
Si3 Si1 C1 106.84(5) yes . . .
Si4 Si1 C1 107.22(6) yes . . .
Si1 Si2 C5 109.42(8) yes . . .
Si1 Si2 C6 111.34(8) yes . . .
Si1 Si2 C7 110.07(9) yes . . .
C5 Si2 C6 108.71(10) yes . . .
C5 Si2 C7 109.44(9) yes . . .
C6 Si2 C7 107.81(10) yes . . .
Si1 Si3 C10 108.95(6) yes . . .
Si1 Si3 C12 108.34(6) yes . . .
Si1 Si3 C13 111.98(7) yes . . .
C10 Si3 C12 109.33(10) yes . . .
C10 Si3 C13 108.83(11) yes . . .
C12 Si3 C13 109.38(11) yes . . .
Si1 Si4 C8 108.39(8) yes . . .
Si1 Si4 C9 111.85(7) yes . . .
Si1 Si4 C11 111.16(9) yes . . .
C8 Si4 C9 108.21(10) yes . . .
C8 Si4 C11 109.44(9) yes . . .
C9 Si4 C11 107.73(12) yes . . .
S1 C1 Si1 121.06(10) yes . . .
S1 C1 C3 108.24(13) yes . . .
Si1 C1 C3 130.70(15) yes . . .
S1 C2 C2 120.83(14) yes . . 2_665
S1 C2 C4 109.63(12) yes . . .
C2 C2 C4 129.54(14) yes 2_665 . .
C1 C3 C4 114.84(19) yes . . .
C2 C4 C3 113.19(15) yes . . .
C1 C3 H3 122.578 no . . .
C4 C3 H3 122.581 no . . .
C2 C4 H4 123.402 no . . .
C3 C4 H4 123.405 no . . .
Si2 C5 H5A 109.472 no . . .
Si2 C5 H5B 109.473 no . . .
Si2 C5 H5C 109.476 no . . .
H5A C5 H5B 109.471 no . . .
H5A C5 H5C 109.469 no . . .
H5B C5 H5C 109.466 no . . .
Si2 C6 H6A 109.467 no . . .
Si2 C6 H6B 109.467 no . . .
Si2 C6 H6C 109.473 no . . .
H6A C6 H6B 109.469 no . . .
H6A C6 H6C 109.475 no . . .
H6B C6 H6C 109.476 no . . .
Si2 C7 H7A 109.478 no . . .
Si2 C7 H7B 109.471 no . . .
Si2 C7 H7C 109.471 no . . .
H7A C7 H7B 109.469 no . . .
H7A C7 H7C 109.474 no . . .
H7B C7 H7C 109.465 no . . .
Si4 C8 H8A 109.464 no . . .
Si4 C8 H8B 109.477 no . . .
Si4 C8 H8C 109.470 no . . .
H8A C8 H8B 109.468 no . . .
H8A C8 H8C 109.468 no . . .
H8B C8 H8C 109.481 no . . .
Si4 C9 H9A 109.473 no . . .
Si4 C9 H9B 109.473 no . . .
Si4 C9 H9C 109.471 no . . .
H9A C9 H9B 109.465 no . . .
H9A C9 H9C 109.468 no . . .
H9B C9 H9C 109.476 no . . .
Si3 C10 H10A 109.468 no . . .
Si3 C10 H10B 109.474 no . . .
Si3 C10 H10C 109.465 no . . .
H10A C10 H10B 109.473 no . . .
H10A C10 H10C 109.476 no . . .
H10B C10 H10C 109.472 no . . .
Si4 C11 H11A 109.472 no . . .
Si4 C11 H11B 109.474 no . . .
Si4 C11 H11C 109.475 no . . .
H11A C11 H11B 109.472 no . . .
H11A C11 H11C 109.470 no . . .
H11B C11 H11C 109.463 no . . .
Si3 C12 H12A 109.465 no . . .
Si3 C12 H12B 109.474 no . . .
Si3 C12 H12C 109.475 no . . .
H12A C12 H12B 109.468 no . . .
H12A C12 H12C 109.469 no . . .
H12B C12 H12C 109.477 no . . .
Si3 C13 H13A 109.469 no . . .
Si3 C13 H13B 109.467 no . . .
Si3 C13 H13C 109.468 no . . .
H13A C13 H13B 109.474 no . . .
H13A C13 H13C 109.473 no . . .
H13B C13 H13C 109.475 no . . .

loop_
_geom_torsion_atom_site_label_1
_geom_torsion_atom_site_label_2
_geom_torsion_atom_site_label_3
_geom_torsion_atom_site_label_4
_geom_torsion
_geom_torsion_publ_flag
_geom_torsion_site_symmetry_1
_geom_torsion_site_symmetry_2
_geom_torsion_site_symmetry_3
_geom_torsion_site_symmetry_4
C1 S1 C2 C2 179.56(8) no . . . 2_665
C1 S1 C2 C4 -0.21(8) no . . . .
C2 S1 C1 Si1 -179.33(7) no . . . .
C2 S1 C1 C3 0.37(8) no . . . .
Si2 Si1 Si3 C10 -59.86(4) no . . . .
Si2 Si1 Si3 C12 -178.72(3) no . . . .
Si2 Si1 Si3 C13 60.57(4) no . . . .
Si3 Si1 Si2 C5 -69.29(4) no . . . .
Si3 Si1 Si2 C6 50.91(4) no . . . .
Si3 Si1 Si2 C7 170.41(3) no . . . .
Si2 Si1 Si4 C8 60.32(4) no . . . .
Si2 Si1 Si4 C9 179.545(19) no . . . .
Si2 Si1 Si4 C11 -59.99(3) no . . . .
Si4 Si1 Si2 C5 57.41(3) no . . . .
Si4 Si1 Si2 C6 177.608(19) no . . . .
Si4 Si1 Si2 C7 -62.89(3) no . . . .
Si2 Si1 C1 S1 -153.88(6) no . . . .
Si2 Si1 C1 C3 26.49(11) no . . . .
C1 Si1 Si2 C5 173.39(5) no . . . .
C1 Si1 Si2 C6 -66.41(5) no . . . .
C1 Si1 Si2 C7 53.09(5) no . . . .
Si3 Si1 Si4 C8 -173.02(3) no . . . .
Si3 Si1 Si4 C9 -53.80(4) no . . . .
Si3 Si1 Si4 C11 66.67(4) no . . . .
Si4 Si1 Si3 C10 175.27(3) no . . . .
Si4 Si1 Si3 C12 56.42(4) no . . . .
Si4 Si1 Si3 C13 -64.29(4) no . . . .
Si3 Si1 C1 S1 84.92(7) no . . . .
Si3 Si1 C1 C3 -94.70(10) no . . . .
C1 Si1 Si3 C10 57.65(7) no . . . .
C1 Si1 Si3 C12 -61.21(7) no . . . .
C1 Si1 Si3 C13 178.08(7) no . . . .
Si4 Si1 C1 S1 -36.38(8) no . . . .
Si4 Si1 C1 C3 143.99(9) no . . . .
C1 Si1 Si4 C8 -55.62(6) no . . . .
C1 Si1 Si4 C9 63.60(6) no . . . .
C1 Si1 Si4 C11 -175.93(6) no . . . .
S1 C1 C3 C4 -0.44(13) no . . . .
Si1 C1 C3 C4 179.22(8) no . . . .
S1 C2 C2 S1 180(94290) no . . 2_665 2_665
S1 C2 C2 C4 0.28(16) no . . 2_665 2_665
S1 C2 C4 C3 -0.00(12) no . . . .
C2 C2 C4 C3 -179.75(10) no 2_665 . . .
C4 C2 C2 S1 -0.28(18) no . . 2_665 2_665
C4 C2 C2 C4 180(118582) no . . 2_665 2_665
C1 C3 C4 C2 0.30(16) no . . . .

loop_
_geom_contact_atom_site_label_1
_geom_contact_atom_site_label_2
_geom_contact_distance
_geom_contact_publ_flag
_geom_contact_site_symmetry_1
_geom_contact_site_symmetry_2
S1 C4 3.2342(19) no . 2_665
S1 H3 3.4430 no . .
S1 H4 3.4555 no . .
S1 H4 2.9650 no . 2_665
S1 H8A 3.4029 no . .
S1 H9C 2.8902 no . .
S1 H12C 3.3244 no . .
Si1 H3 3.1804 no . .
Si1 H5A 3.5680 no . .
Si1 H5C 3.5283 no . .
Si1 H6A 3.5806 no . .
Si1 H7A 3.5441 no . .
Si1 H7C 3.5768 no . .
Si1 H8A 3.4554 no . .
Si1 H9B 3.5889 no . .
Si1 H10A 3.4563 no . .
Si1 H11A 3.5984 no . .
Si1 H12C 3.4445 no . .
Si1 H13C 3.5931 no . .
Si2 H3 3.3526 no . .
C1 H4 3.2388 no . .
C1 H7A 3.4598 no . .
C1 H8A 3.3959 no . .
C1 H10A 3.4212 no . .
C1 H12C 3.4561 no . .
C2 H3 3.2086 no . .
C2 H4 2.8294 no . 2_665
C3 H6A 3.1984 no . .
C3 H7A 3.2723 no . .
C3 H10A 3.5305 no . .
C5 H6B 3.1886 no . .
C5 H6C 3.1995 no . .
C5 H7B 3.2238 no . .
C5 H7C 3.1990 no . .
C5 H11C 3.1074 no . .
C5 H13C 3.4995 no . .
C6 H3 3.1378 no . .
C6 H5B 3.1643 no . .
C6 H5C 3.2274 no . .
C6 H7A 3.1981 no . .
C6 H7B 3.1428 no . .
C6 H10C 3.2392 no . .
C7 H3 3.5799 no . .
C7 H5A 3.2002 no . .
C7 H5B 3.2248 no . .
C7 H6A 3.1868 no . .
C7 H6C 3.1531 no . .
C7 H8B 3.2295 no . .
C8 H7C 3.1430 no . .
C8 H9A 3.2253 no . .
C8 H9C 3.1547 no . .
C8 H11B 3.2202 no . .
C8 H11C 3.2106 no . .
C9 H8A 3.2731 no . .
C9 H8C 3.1117 no . .
C9 H11A 3.2020 no . .
C9 H11B 3.1520 no . .
C9 H12A 3.2443 no . .
C10 H6B 3.2545 no . .
C10 H12B 3.1463 no . .
C10 H12C 3.2681 no . .
C10 H13A 3.1686 no . .
C10 H13C 3.2296 no . .
C11 H5A 3.1284 no . .
C11 H8B 3.1598 no . .
C11 H8C 3.2751 no . .
C11 H9A 3.1291 no . .
C11 H9B 3.2276 no . .
C12 H9B 3.1616 no . .
C12 H10A 3.2720 no . .
C12 H10B 3.1435 no . .
C12 H13A 3.2355 no . .
C12 H13B 3.1844 no . .
C13 H5C 3.4346 no . .
C13 H10B 3.2602 no . .
C13 H10C 3.1394 no . .
C13 H11A 3.5471 no . .
C13 H12A 3.1560 no . .
C13 H12B 3.2638 no . .
H3 H4 2.4517 no . .
H3 H6A 2.3559 no . .
H3 H7A 2.9227 no . .
H3 H10A 3.4633 no . .
H5A H7B 3.4522 no . .
H5A H7C 3.0328 no . .
H5A H11A 3.4035 no . .
H5A H11C 2.2791 no . .
H5B H6B 3.3804 no . .
H5B H6C 3.0110 no . .
H5B H7B 3.0847 no . .
H5B H7C 3.4519 no . .
H5C H6B 3.0658 no . .
H5C H6C 3.4850 no . .
H5C H11C 3.2874 no . .
H5C H13C 2.6350 no . .
H6A H7A 3.0539 no . .
H6A H7B 3.3910 no . .
H6A H10C 3.3253 no . .
H6B H10A 3.4382 no . .
H6B H10C 2.4611 no . .
H6C H7A 3.4213 no . .
H6C H7B 2.9606 no . .
H7A H8B 3.5103 no . .
H7C H8A 3.2367 no . .
H7C H8B 2.3759 no . .
H8A H9A 3.5874 no . .
H8A H9C 3.0884 no . .
H8B H11B 3.3808 no . .
H8B H11C 3.0008 no . .
H8C H9A 2.9937 no . .
H8C H9C 3.2605 no . .
H8C H11B 3.1319 no . .
H8C H11C 3.5305 no . .
H9A H11A 3.3786 no . .
H9A H11B 2.9379 no . .
H9B H11A 3.0937 no . .
H9B H11B 3.4468 no . .
H9B H12A 2.3920 no . .
H9B H12C 3.2582 no . .
H9C H12A 3.4912 no . .
H10A H12B 3.4527 no . .
H10A H12C 3.1883 no . .
H10B H12B 2.9253 no . .
H10B H12C 3.4430 no . .
H10B H13A 3.0801 no . .
H10B H13C 3.5639 no . .
H10C H13A 3.3072 no . .
H10C H13C 3.0174 no . .
H11A H13B 2.7700 no . .
H12A H13A 3.4097 no . .
H12A H13B 2.9747 no . .
H12B H13A 3.1416 no . .
H12B H13B 3.4899 no . .
S1 H6B 3.2918 no . 1_455
S1 H10B 3.3182 no . 2_755
S1 H12B 3.1603 no . 2_755
C1 H12B 3.4619 no . 2_755
C2 H12B 3.4042 no . 1_465
C2 H12B 2.8449 no . 2_755
C2 H13A 3.4882 no . 1_465
C3 H12B 3.3779 no . 2_755
C3 H13A 3.5000 no . 1_465
C4 H6A 3.3660 no . 2_765
C4 H10B 3.2241 no . 1_465
C4 H12B 3.0441 no . 2_755
C4 H13A 3.4369 no . 1_465
C5 H5B 3.3208 no . 2_766
C5 H8C 3.3008 no . 1_655
C5 H8C 3.4586 no . 2_666
C5 H9A 3.4929 no . 1_655
C5 H11A 3.3152 no . 2_756
C6 H4 3.4211 no . 2_765
C6 H8A 3.3463 no . 1_655
C6 H9C 3.2614 no . 1_655
C6 H12A 3.3610 no . 1_565
C7 H8C 3.2588 no . 2_666
C7 H9A 3.4365 no . 1_565
C7 H9B 3.0831 no . 1_565
C7 H11B 3.5013 no . 2_666
C8 H5A 3.3866 no . 2_666
C8 H5B 3.4262 no . 1_455
C8 H6C 3.2414 no . 1_455
C8 H7C 3.1414 no . 2_666
C8 H8B 3.3581 no . 2_666
C9 H5C 3.4737 no . 1_455
C9 H6B 3.2421 no . 1_455
C9 H7A 3.2052 no . 1_545
C9 H7B 3.3466 no . 1_545
C9 H13C 3.5121 no . 1_455
C10 H4 3.3251 no . 2_765
C10 H12C 3.2581 no . 2_755
C11 H5C 3.2843 no . 2_756
C11 H7C 3.4663 no . 2_666
C12 H6A 3.3662 no . 1_545
C12 H10A 3.3268 no . 2_755
C12 H12C 3.2564 no . 2_755
C13 H6C 3.5371 no . 1_545
C13 H8A 3.2966 no . 1_645
H3 H3 3.5836 no . 2_765
H3 H12A 3.5085 no . 1_565
H4 C6 3.4211 no . 2_765
H4 C10 3.3251 no . 2_765
H4 H6A 2.8880 no . 2_765
H4 H6B 3.0819 no . 2_765
H4 H10A 2.9176 no . 2_765
H4 H10B 2.7869 no . 1_465
H4 H10C 2.8851 no . 2_765
H4 H12B 3.4649 no . 2_755
H5A C8 3.3866 no . 2_666
H5A H5B 3.4130 no . 2_766
H5A H8A 3.5682 no . 2_666
H5A H8B 3.1565 no . 2_666
H5A H8C 2.9157 no . 2_666
H5A H11A 3.0534 no . 2_756
H5B C5 3.3208 no . 2_766
H5B C8 3.4262 no . 1_655
H5B H5A 3.4130 no . 2_766
H5B H5B 2.5005 no . 2_766
H5B H7B 3.1240 no . 2_766
H5B H8A 3.5987 no . 1_655
H5B H8C 2.5198 no . 1_655
H5B H8C 3.2822 no . 2_666
H5B H9A 3.4897 no . 1_655
H5B H11A 3.4488 no . 2_756
H5C C9 3.4737 no . 1_655
H5C C11 3.2843 no . 2_756
H5C H8C 3.3238 no . 1_655
H5C H9A 2.7063 no . 1_655
H5C H9C 3.4251 no . 1_655
H5C H11A 2.9169 no . 2_756
H5C H11B 3.0094 no . 2_756
H5C H11C 3.3990 no . 2_756
H6A C4 3.3660 no . 2_765
H6A C12 3.3662 no . 1_565
H6A H4 2.8880 no . 2_765
H6A H12A 2.7614 no . 1_565
H6A H12B 3.0751 no . 1_565
H6B S1 3.2918 no . 1_655
H6B C9 3.2421 no . 1_655
H6B H4 3.0819 no . 2_765
H6B H8A 3.3000 no . 1_655
H6B H9A 3.3312 no . 1_655
H6B H9C 2.4044 no . 1_655
H6C C8 3.2414 no . 1_655
H6C C13 3.5371 no . 1_565
H6C H8A 2.5609 no . 1_655
H6C H8C 3.0841 no . 1_655
H6C H9C 3.3564 no . 1_655
H6C H12A 3.1028 no . 1_565
H6C H12B 3.5705 no . 1_565
H6C H13A 3.3179 no . 1_565
H6C H13B 2.9446 no . 1_565
H7A C9 3.2052 no . 1_565
H7A H9A 3.0135 no . 1_565
H7A H9B 2.5379 no . 1_565
H7A H12A 3.4639 no . 1_565
H7A H13A 3.2816 no . 1_465
H7A H13C 3.3242 no . 1_465
H7B C9 3.3466 no . 1_565
H7B H5B 3.1240 no . 2_766
H7B H8C 3.0686 no . 2_666
H7B H9A 3.1364 no . 1_565
H7B H9B 2.7520 no . 1_565
H7B H11A 3.0824 no . 1_565
H7B H11B 3.4981 no . 1_565
H7B H11B 3.3342 no . 2_666
H7C C8 3.1414 no . 2_666
H7C C11 3.4663 no . 2_666
H7C H8B 2.8216 no . 2_666
H7C H8C 2.6769 no . 2_666
H7C H11B 2.9632 no . 2_666
H7C H11C 3.2760 no . 2_666
H8A C6 3.3463 no . 1_455
H8A C13 3.2966 no . 1_465
H8A H5A 3.5682 no . 2_666
H8A H5B 3.5987 no . 1_455
H8A H6B 3.3000 no . 1_455
H8A H6C 2.5609 no . 1_455
H8A H13A 2.8315 no . 1_465
H8A H13B 2.9349 no . 1_465
H8B C8 3.3581 no . 2_666
H8B H5A 3.1565 no . 2_666
H8B H7C 2.8216 no . 2_666
H8B H8B 2.4691 no . 2_666
H8B H8C 3.5664 no . 2_666
H8B H11C 3.0998 no . 2_666
H8C C5 3.3008 no . 1_455
H8C C5 3.4586 no . 2_666
H8C C7 3.2588 no . 2_666
H8C H5A 2.9157 no . 2_666
H8C H5B 2.5198 no . 1_455
H8C H5B 3.2822 no . 2_666
H8C H5C 3.3238 no . 1_455
H8C H6C 3.0841 no . 1_455
H8C H7B 3.0686 no . 2_666
H8C H7C 2.6769 no . 2_666
H8C H8B 3.5664 no . 2_666
H9A C5 3.4929 no . 1_455
H9A C7 3.4365 no . 1_545
H9A H5B 3.4897 no . 1_455
H9A H5C 2.7063 no . 1_455
H9A H6B 3.3312 no . 1_455
H9A H7A 3.0135 no . 1_545
H9A H7B 3.1364 no . 1_545
H9A H11B 2.8211 no . 2_656
H9A H13C 2.9160 no . 1_455
H9B C7 3.0831 no . 1_545
H9B H7A 2.5379 no . 1_545
H9B H7B 2.7520 no . 1_545
H9C C6 3.2614 no . 1_455
H9C H5C 3.4251 no . 1_455
H9C H6B 2.4044 no . 1_455
H9C H6C 3.3564 no . 1_455
H9C H10C 3.0547 no . 1_455
H9C H13C 3.4142 no . 1_455
H10A C12 3.3268 no . 2_755
H10A H4 2.9176 no . 2_765
H10A H12A 3.5352 no . 2_755
H10A H12B 3.3541 no . 2_755
H10A H12C 2.6268 no . 2_755
H10B S1 3.3182 no . 2_755
H10B C4 3.2241 no . 1_645
H10B H4 2.7869 no . 1_645
H10B H10B 3.3465 no . 2_855
H10B H10C 3.2724 no . 2_855
H10B H12C 3.2195 no . 2_755
H10C H4 2.8851 no . 2_765
H10C H9C 3.0547 no . 1_655
H10C H10B 3.2724 no . 2_855
H11A C5 3.3152 no . 2_756
H11A H5A 3.0534 no . 2_756
H11A H5B 3.4488 no . 2_756
H11A H5C 2.9169 no . 2_756
H11A H7B 3.0824 no . 1_545
H11B C7 3.5013 no . 2_666
H11B H5C 3.0094 no . 2_756
H11B H7B 3.4981 no . 1_545
H11B H7B 3.3342 no . 2_666
H11B H7C 2.9632 no . 2_666
H11B H9A 2.8211 no . 2_656
H11B H11B 3.2595 no . 2_656
H11B H13C 3.5044 no . 2_756
H11C H5C 3.3990 no . 2_756
H11C H7C 3.2760 no . 2_666
H11C H8B 3.0998 no . 2_666
H11C H13B 3.4673 no . 2_756
H11C H13C 3.4064 no . 2_756
H12A C6 3.3610 no . 1_545
H12A H3 3.5085 no . 1_545
H12A H6A 2.7614 no . 1_545
H12A H6C 3.1028 no . 1_545
H12A H7A 3.4639 no . 1_545
H12A H10A 3.5352 no . 2_755
H12B S1 3.1603 no . 2_755
H12B C1 3.4619 no . 2_755
H12B C2 3.4042 no . 1_645
H12B C2 2.8449 no . 2_755
H12B C3 3.3779 no . 2_755
H12B C4 3.0441 no . 2_755
H12B H4 3.4649 no . 2_755
H12B H6A 3.0751 no . 1_545
H12B H6C 3.5705 no . 1_545
H12B H10A 3.3541 no . 2_755
H12B H12C 3.2250 no . 2_755
H12C C10 3.2581 no . 2_755
H12C C12 3.2564 no . 2_755
H12C H10A 2.6268 no . 2_755
H12C H10B 3.2195 no . 2_755
H12C H12B 3.2250 no . 2_755
H12C H12C 2.6184 no . 2_755
H13A C2 3.4882 no . 1_645
H13A C3 3.5000 no . 1_645
H13A C4 3.4369 no . 1_645
H13A H6C 3.3179 no . 1_545
H13A H7A 3.2816 no . 1_645
H13A H8A 2.8315 no . 1_645
H13B H6C 2.9446 no . 1_545
H13B H8A 2.9349 no . 1_645
H13B H11C 3.4673 no . 2_756
H13C C9 3.5121 no . 1_655
H13C H7A 3.3242 no . 1_645
H13C H9A 2.9160 no . 1_655
H13C H9C 3.4142 no . 1_655
H13C H11B 3.5044 no . 2_756
H13C H11C 3.4064 no . 2_756

#==============================================================================

#==============================================================================
# Additional structures and associated data_? identifiers
# should be added at this point if there is more than one 
# structure analysis in the CIF.

#==============================================================================
#     End of CIF
#==============================================================================
